# Supplementary material for: Dithionite and sulfinate complexes from the reaction of SO2with decamethylsamarocene
Source: Royal Society of Chemistry journal article supplement (doi:10.1039/c5nj00318k), 2015-01-01
Supplement: c5nj00318k1.pdf [file c5nj00318k1.pdf]

## Supporting Information

### Dithionite and Sulfinato Complexes from the Reaction of SO<sub>2</sub> with Decamethylsamarocene

Svetlana V. Klementyeva,<sup>[a,b]</sup> Nicholas Arleth,<sup>[a]</sup> Karsten Meyer,<sup>[c]</sup> Sergey N. Konchenko,<sup>\*[a,d]</sup> and Peter W. Roesky<sup>\*[a]</sup>

---

[a] Institut für Anorganische Chemie, Karlsruher Institut für Technologie (KIT), Engesserstr. 15, Geb. 30.45, 76131 Karlsruhe (Germany)  
Fax: +49-721-608-44854  
E-mail: roesky@kit.edu

[b] G.A. Razuvaev Institute of Organometallic Chemistry, RAS, Tropinina str. 49, 603950 Nizhny Novgorod, (Russia)

[c] Universität Erlangen-Nürnberg, Department Chemie und Pharmazie, Egerlandstr. 1, 91058 Erlangen, (Germany)  
Fax: +49 (0)9131 8527367  
E-mail: karsten.meyer@fau.de

[d] Nikolaev Institute of Inorganic Chemistry SB RAS, Prosp. Lavrentieva 3, 630090 Novosibirsk (Russia)  
and  
Novosibirsk State University Pirogova str. 2, 630090 Novosibirsk (Russia)  
E-mail: [konch@niic.nsc.ru](mailto:konch@niic.nsc.ru)

**Figure S1.** NIR-spectrum of **1**.

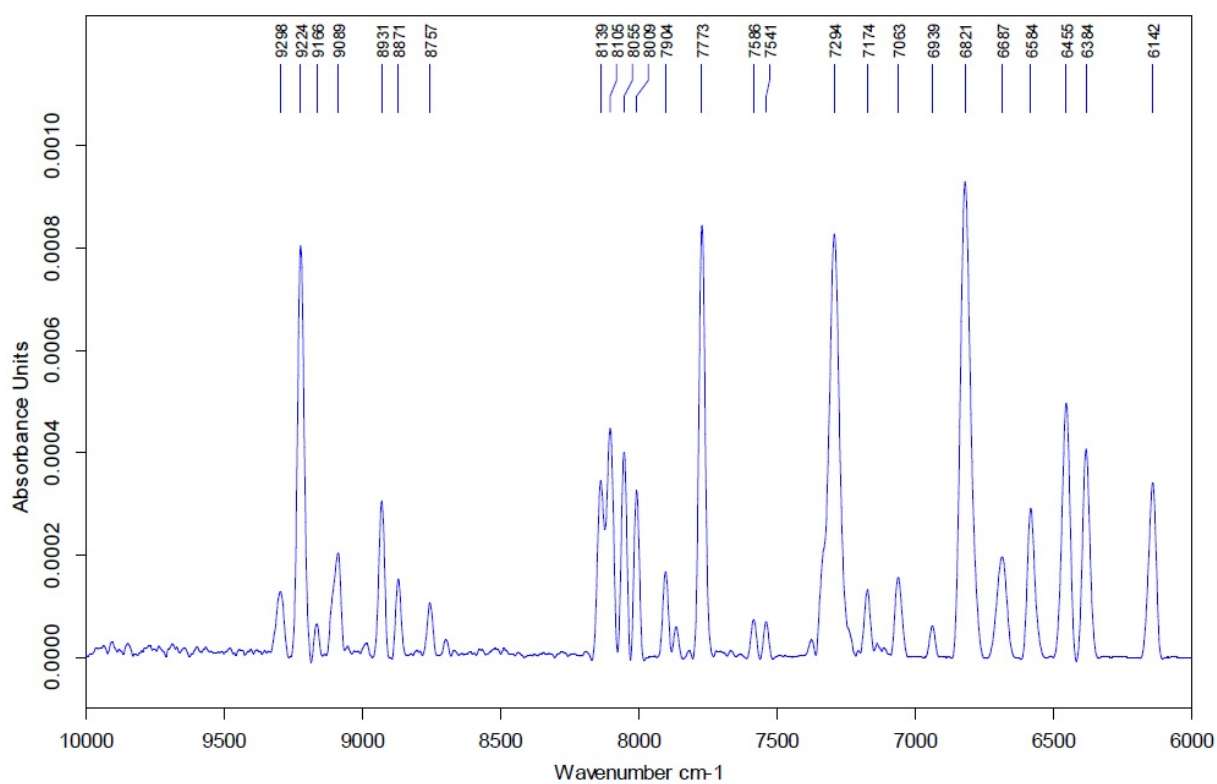

**Figure S2.** NIR-spectrum of **2**.

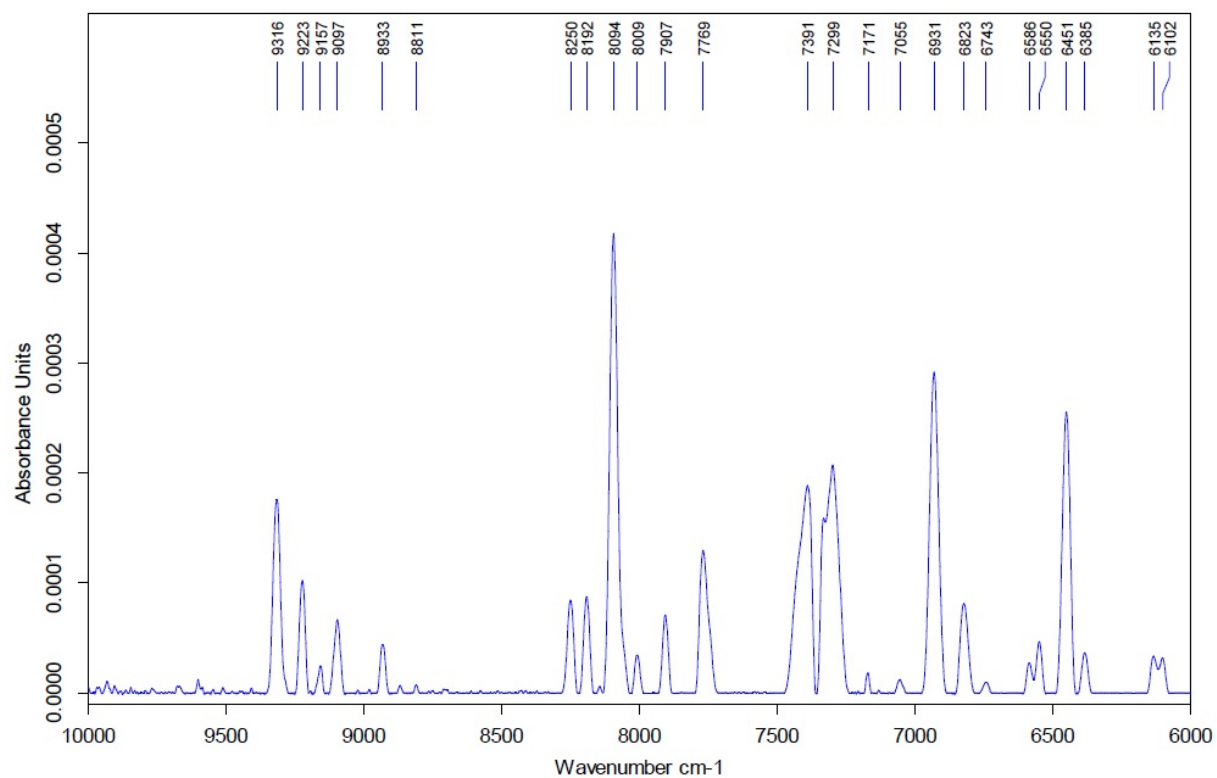

**Figure S3.** IR-spectrum of **1**.

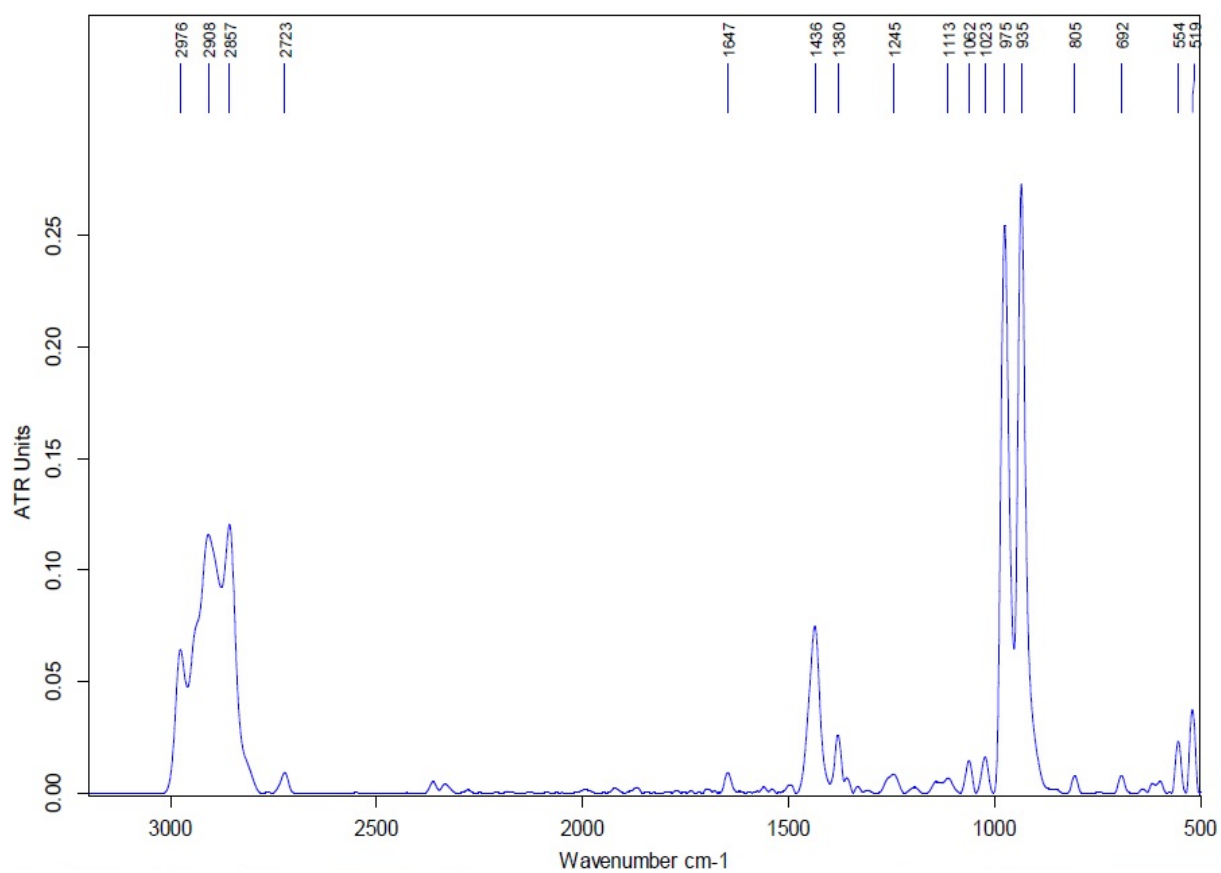

**Figure S4.** IR-spectrum of **2**.

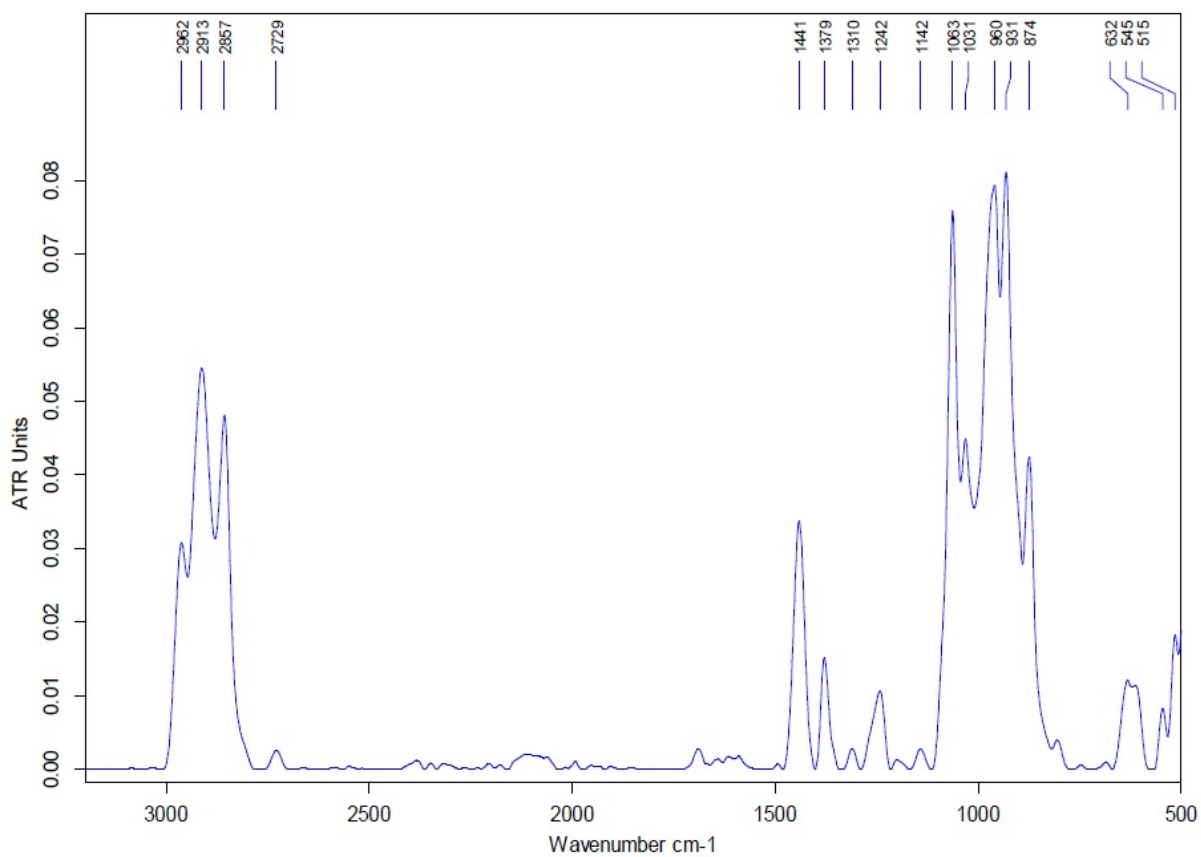

**Figure S5.** Raman-spectrum of **1**.

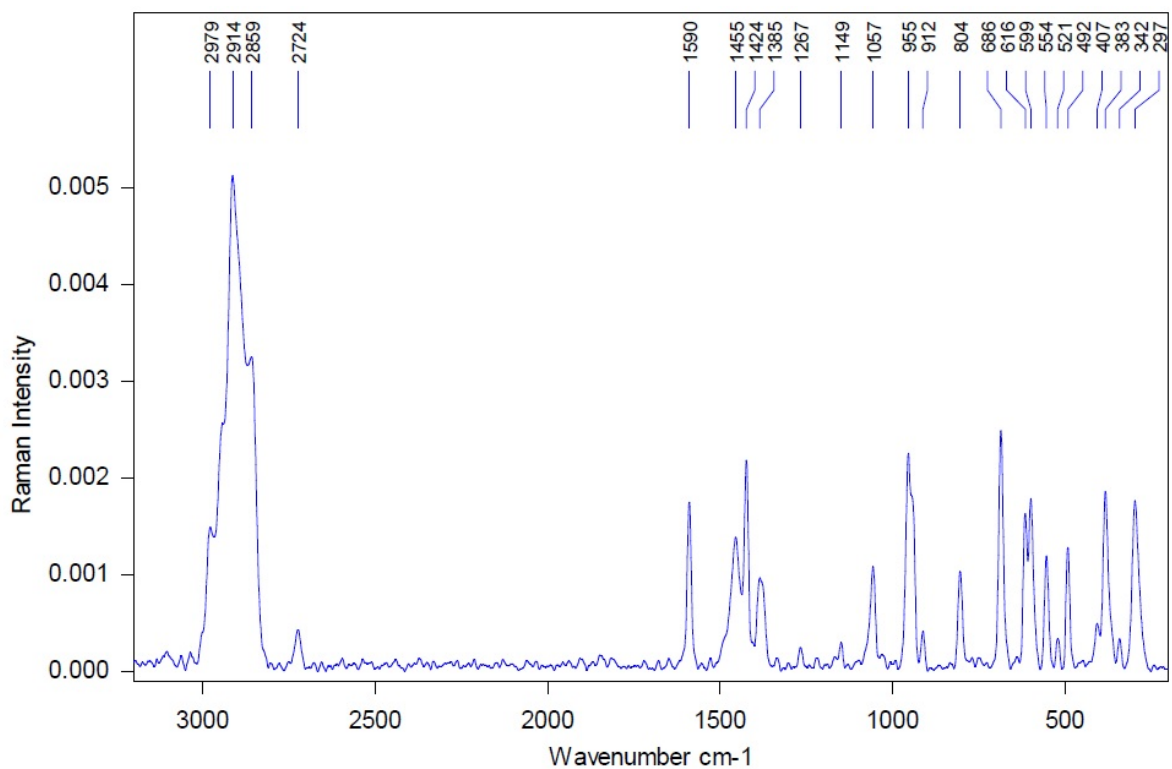

**Figure S6.** Raman-spectrum of **2**.

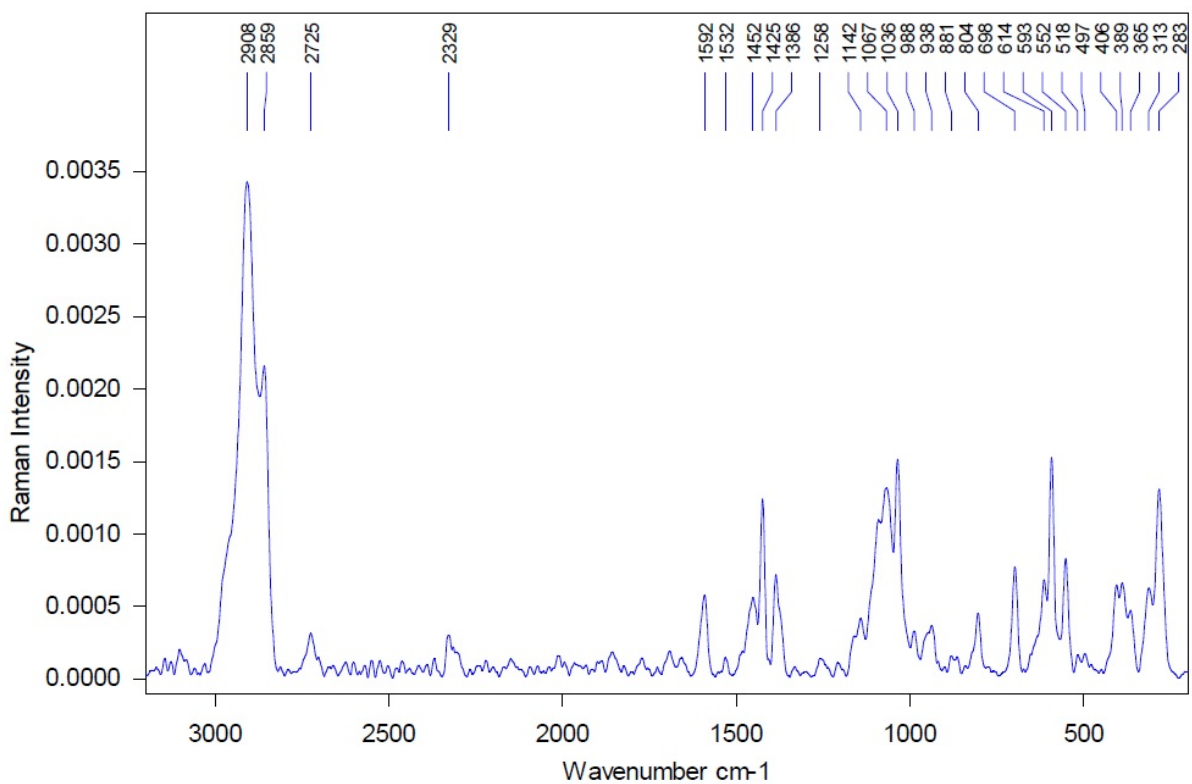

**Figure S7.** Temperature-dependent SQUID magnetization data for **1** per one metal center.

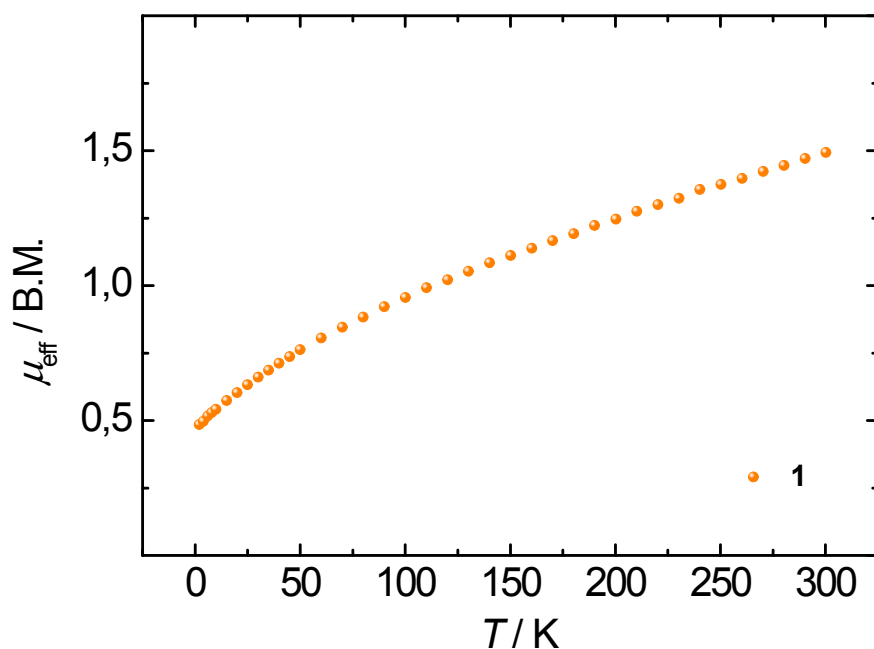

The ground term for  $\text{Sm}^{3+}$  ( $f^5$ ) is  $J = 5/2$ , therefore, and based on the isolated free ion ground term  ${}^6H_{5/2}$ , a magnetic moment of  $0.84\mu_B$  is calculated. However, the corresponding experimental value is typically observed around  $1.5\mu_B$ . [1] The observed significant difference results from nearby (low-lying) excited terms, with separations comparable to  $kT$  at room temperature and, consequently, their contributions to the susceptibility cannot be neglected. For  $\text{Sm}^{3+}$ , the first excited term,  $J = 7/2$ , is approx.  $1000 \text{ cm}^{-1}$  above the ground term ( $J = 5/2$ ).

Considering the close separation between the lowest lying terms for  $\text{Sm}^{3+}$  the dependence of  $\chi_m$  on  $T$  is small. Accordingly, the magnetic moment per  $\text{Sm}^{3+}$  ion range from  $0.69\mu_B$  at 2 K to  $1.49\mu_B$  at 300 K.

## References

- [1] E.A. Boudreaux and L.N. Mulay, "Theory and Application of Molecular Paramagnetism", John Wiley & Sons, 1976. Chapter 5 "Magnetic Behavior of Lanthanide Compounds" by A.T. Casey and S. Mitra.
